# Supplementary material for: Best Practices and Progress in Precision-Cut Liver Slice Cultures
Source: MDPI journal article supplement (doi:10.3390/ijms22137137), 2021-07-01
Supplement: s1 [file s1]

*Supplementary Table S1. Analyzed PCLS publications and parameters used for statistics.*

| <i>Author</i>      | <i>Ø<br/>(mm)</i> | <i>↑<br/>(µm)</i> | <i>Slicer</i> | <i>Species</i> | <i>Time<br/>(h)</i> | <i>Disease</i>                            |
|--------------------|-------------------|-------------------|---------------|----------------|---------------------|-------------------------------------------|
| Midwoud 2011[1]    | 4                 | 200-300           | Krumdieck     | Rat            | 72                  | Characterization<br>Metabolization        |
| Lemaire 2011[2]    | 8                 | < 200             | Krumdieck     | Fish           | < 24                | Toxicology<br>Metabolization              |
| Khan 2011[3]       | 8                 | 200-300           | Krumdieck     | Rat<br>Human   | 24                  | Toxicology<br>Metabolization              |
| Kasper 2011[4]     | 8                 | 200-300           | Vitron        | Porcine        | 48                  | Optimization                              |
| Elferink 2011[5]   | 8                 | 200-300           | Krumdieck     | Human          | 24                  | Metabolization                            |
| Burkhardt 2011[6]  | 8                 | 200-300           | Vitron        | Rat            | 24                  | Metabolization                            |
| Bie 2011[7]        | ns                | ns                | ns            | Mouse          | < 24                | Steatosis                                 |
| Thomes 2012[8]     | 8                 | 200-300           | Vitron        | Rat            | 24                  | Alcoholic liver disease<br>Metabolization |
| Rijk 2012[9]       | 8                 | 200-300           | Krumdieck     | Bovine         | < 24                | Metabolization                            |
| Lemaire 2012[10]   | 8                 | < 200             | Krumdieck     | Fish           | < 24                | Environmental toxicity                    |
| Guo 2012[11]       | 8                 | 200-300           | Vibratome     | Rat            | < 24                | Fibrosis                                  |
| Guan 2012[12]      | 5                 | 200-300           | Krumdieck     | Rat            | < 24                | Optimization                              |
| Dragoni 2012[13]   | 8                 | 200-300           | Krumdieck     | Rat            | 24                  | Toxicity                                  |
| Wang 2013[14]      | 8                 | 200-300           | ns            | Rat            | 24                  | Fibrosis                                  |
| Szalowska 2013[15] | 5                 | 200-300           | Krumdieck     | Mouse          | 24                  | Cholestasis                               |

|                         |       |         |           |                       |      |                                                                  |
|-------------------------|-------|---------|-----------|-----------------------|------|------------------------------------------------------------------|
|                         |       |         |           |                       |      | Toxicity                                                         |
| Szalowska 2013[16]      | 5     | 200-300 | Krumdieck | Mouse                 | 24   | Optimization                                                     |
| Moran-Salvador 2013[17] | Other | 200-300 | Vibratome | Mouse                 | < 24 | Fibrosis<br>Inflammation                                         |
| Morales-Ibanez 2013[18] | ns    | 200-300 | Vibratome | Mouse                 | 48   | Alcoholic liver disease                                          |
| Karim 2013[19]          | ns    | 200-300 | Krumdieck | Human                 | 48   | Alcoholic liver disease                                          |
| Hadi 2013[20]           | 5     | 200-300 | Krumdieck | Human                 | 24   | Toxicity                                                         |
| Hadi 2013[21]           | 5     | 200-300 | Krumdieck | Mouse<br>Rat<br>Human | 24   | Toxicity                                                         |
| Guan 2013[22]           | 5     | 200-300 | Krumdieck | Rat                   | < 24 | Optimization                                                     |
| Duryee 2014[23]         | 8     | 200-300 | Vitron    | Rat                   | 72   | Alcoholic liver disease<br>Fatty liver disease                   |
| Westra 2014[24]         | 5     | 200-300 | Krumdieck | Rat                   | 48   | Fibrosis                                                         |
| Westra 2014[25]         | 5     | 200-300 | Krumdieck | Rat                   | 72   | Fibrosis                                                         |
| Van Swelm 2014[26]      | 5     | 200-300 | Krumdieck | Mouse<br>Rat          | 48   | Toxicity                                                         |
| Szalowska 2014[27]      | 5     | 200-300 | Krumdieck | Mouse                 | 24   | Steatosis                                                        |
| Szalowska 2014[28]      | 5     | 200-300 | Krumdieck | Mouse                 | 24   | Compound testing                                                 |
| Rius 2014[29]           | Other | 200-300 | Vibratome | Mouse                 | 24   | Steatosis                                                        |
| Kwon 2014[30]           | 8     | 200-300 | Vitron    | Mouse                 | 72   | Alcoholic liver disease<br>Steatosis<br>Inflammation<br>Fibrosis |

|                      |         |         |                |               |      |                         |
|----------------------|---------|---------|----------------|---------------|------|-------------------------|
| Koch 2014[31]        | Other   | 200-300 | Krumdieck      | Mouse<br>Rat  | 72   | Cancer                  |
| Jetten 2014[32]      | 4       | < 200   | Krumdieck      | Human         | 24   | Metabolization          |
| Fredriksson 2014[33] | 4       | 200-300 | Krumdieck      | Human         | 24   | Toxicity                |
| Eide 2014[34]        | 8       | 200-300 | Other          | Fish          | 48   | Toxicity                |
| Vatakuti 2015[35]    | 8       | 200-300 | Krumdieck      | Rat           | 24   | Toxicity<br>Fibrosis    |
| Starokozhko 2015[36] | 5       | 200-300 | Krumdieck      | Rat           | > 72 | Optimization            |
| Sadasivan 2015[37]   | Other   | < 200   | Vibratome      | Mouse         | 48   | Fibrosis                |
| Page 2015[38]        | ns      | ns      | ns             | Rat           | 72   | Alcoholic liver disease |
| Okun 2015[39]        | 8       | 200-300 | Krumdieck      | Mouse         | < 24 | Other                   |
| Mattei 2015[40]      | Other   | 200-300 | Vibratome      | Porcine       | < 24 | Characterization        |
| Maté 2015[41]        | 8<br>10 | 200-300 | Brendel        | Rat<br>Bovine | < 24 | Metabolization          |
| Liu 2015[42]         | Other   | 200-300 | Other          | Fish          | < 24 | Toxicity                |
| Janssen 2015[43]     | 5       | 200-300 | Krumdieck      | Human         | 24   | Compound testing        |
| Du 2015[44]          | Other   | 200-300 | Other          | Fish          | < 24 | Toxicity                |
| Daum 2015[45]        | 5       | 200-300 | Krumdieck      | Rat           | 48   | Toxicity                |
| Westra 2016[46]      | 5       | 200-300 | Krumdieck      | Human         | 48   | Fibrosis                |
| Viviani 2017[47]     | 10      | 200-300 | Brendel/Vitron | Bovine        | < 24 | Toxicity                |
| Vatakuti 2017[48]    | 5       | 200-300 | Krumdieck      | Human         | 24   | Cholestasis             |

|                            |       |         |                |                |          |                                      |
|----------------------------|-------|---------|----------------|----------------|----------|--------------------------------------|
| Vatakuti 2016[49]          | 5     | 200-300 | Krumdieck      | Human          | 24       | Toxicity                             |
| Starokozhko 2017[50]       | 5     | 200-300 | Krumdieck      | Human          | > 72     | Optimization                         |
| Iswandana 2016[51]         | 5     | > 300   | Krumdieck      | Rat<br>Mouse   | 48       | Toxicity<br>Fibrosis<br>Inflammation |
| Ijssennagger 2016[52]      | 5     | 200-300 | Krumdieck      | Human<br>Mouse | 24       | Compound testing                     |
| Coombes 2016[53]           | ns    | 200-300 | Krumdieck      | Mouse          | 48       | NASH<br>Fibrosis                     |
| Bizarro 2016[54]           | 8     | 200-300 | Other          | Fish           | 48       | Toxicity                             |
| Vilaseca 2017[55]          | ns    | 200-300 | Vibratome      | Human          | 24       | Cirrhosis                            |
| Pushparajah 2017[56]       | 8     | 200-300 | Krumdieck      | Rat            | 24       | Metabolization                       |
| Villalobos-Garcia 2017[57] | 8     | > 300   | Krumdieck      | Rat            | < 24     | Alcoholic liver disease              |
| Starokozhko 2017[58]       | 5     | 200-300 | Krumdieck      | Rat            | 48       | Cholestasis                          |
| de Mesquita 2017[59]       | ns    | 200-300 | Vibratome      | Human          | 24       | Cirrhosis                            |
| Fortin 2017[60]            | 5     | 200-300 | Vibratome      | Bovine         | 72       | Steatosis                            |
| Luangmonkong 2017[61]      | 8     | 200-300 | Krumdieck      | Human<br>Rat   | 48<br>72 | Fibrosis                             |
| Granitzny 2017[62]         | 8     | 200-300 | Krumdieck      | Rat            | 24       | Toxicity                             |
| Cao 2017[63]               | Other | 200-300 | Other          | Fish           | < 24     | Toxicity<br>Inflammation             |
| Viviani 2018[64]           | 10    | 200-300 | Brendel/Vitron | Bovine         | < 24     | Metabolization                       |
| Yadetie 2018[65]           | 8     | 200-300 | Vibratome      | Fish           | 48       | Toxicity                             |

|                       |       |         |                |              |      |                                           |
|-----------------------|-------|---------|----------------|--------------|------|-------------------------------------------|
| Stuchlikova 2018[66]  | 8     | < 200   | Krumdieck      | Human        | 24   | Metabolization                            |
| Rodriguez 2018[67]    | ns    | ns      | ns             | Human        | ns   | Compound testing                          |
| Starokozhko 2018[68]  | 8     | 200-300 | Krumdieck      | Human        | 24   | Other                                     |
| Quesnot 2018[69]      | ns    | ns      | Vibratome      | Human        | ns   | Metabolization                            |
| Wu 2018[70]           | 6     | 200-300 | Vibratome      | Human        | > 72 | Characterization<br>Immunology            |
| Rius 2018[71]         | Other | 200-300 | Vibratome      | Mouse        | 24   | Steatosis                                 |
| Prins 2019[72]        | 8     | 200-300 | Krumdieck      | Rat          | 48   | NAFLD                                     |
| Lev-Cohain 2019[73]   | Other | > 300   | Other          | Mouse        | < 24 | Metabolization                            |
| Luangmonkong 2018[74] | 8     | 200-300 | Krumdieck      | Human<br>Rat | 48   | Fibrosis                                  |
| Duryee 2018[75]       | 8     | 200-300 | Brendel/Vitron | Mouse        | 72   | Metabolization<br>Alcoholic liver disease |
| Beaumont 2018[76]     | 5     | 200-300 | Krumdieck      | Mouse        | < 24 | Inflammation<br>Steatosis                 |
| Maté 2019[77]         | 10    | 200-300 | Brendel/Vitron | Bovine       | < 24 | Metabolization                            |
| Paish 2019[78]        | 8     | 200-300 | Vibratome      | Human<br>Rat | > 72 | Optimization<br>Fibrosis                  |
| Stärkel 2019[79]      | 8     | 200-300 | Krumdieck      | Human        | 72   | Alcoholic liver disease<br>Fibrosis       |
| Stefanovic 2019[80]   | 8     | > 300   | Krumdieck      | Rat          | 72   | Fibrosis                                  |
| Harvey 2019[81]       | Other | 200-300 | Other          | Fish         | > 72 | Steatosis                                 |
| De Chiara 2020[82]    | 8     | 200-300 | Vibratome      | Rat          | > 72 | NAFLD                                     |

|                         |        |         |           |       |      |                            |
|-------------------------|--------|---------|-----------|-------|------|----------------------------|
|                         |        |         |           |       |      | Fibrosis                   |
| Bigaeva 2019[83]        | 8      | 200-300 | Krumdieck | Mouse | 48   | Characterization           |
| Gore 2019[84]           | 5      | 200-300 | Krumdieck | Human | 48   | Fibrosis                   |
| Gore 2020[85]           | 5      | 200-300 | Krumdieck | Mouse | 48   | Fibrosis<br>Inflammation   |
| Bigaeva 2020[86]        | 6      | 200-300 | Krumdieck | Mouse | 48   | Fibrosis                   |
| Bartucci 2020[87]       | 5      | 200-300 | Krumdieck | Rat   | 72   | Other                      |
| Daga 2020[88]           | 5      | 200-300 | Krumdieck | Human | 24   | Toxicity                   |
| Palma 2020[89]          | 5      | 200-300 | Krumdieck | Rat   | 24   | Alcoholic liver disease    |
| Zhang 2020[90]          | 2      | 200-300 | Other     | Human | > 72 | Optimization               |
| Aoudjehane 2020[91]     | 5      | 200-300 | Vibratome | Human | 24   | Steatosis<br>Optimization  |
| Kenerson 2020[92]       | 4<br>6 | 200-300 | Vibratome | Human | > 72 | Cancer<br>Characterization |
| Van Dijk 2020[93]       | 8      | 200-300 | Krumdieck | Human | 48   | Fibrosis                   |
| Adhyatmika 2020[94]     | 5      | 200-300 | Krumdieck | Human | 48   | Fibrosis                   |
| Suriguga 2020[95]       | 6      | 200-300 | Krumdieck | Mouse | 48   | Inflammation/Immunology    |
| Serrano 2021[96]        | 8      | 200-300 | Krumdieck | Mouse | 48   | Metabolization             |
| Shepherd 2020[97]       | 8      | 200-300 | Krumdieck | Fish  | 48   | Steatosis                  |
| Barcena-Varela 2021[98] | 8      | 200-300 | Krumdieck | Mouse | 48   | Steatosis                  |
|                         |        |         | Vibratome | Human | 24   | Fibrosis                   |

|                               |       |                  |           |         |       |                          |
|-------------------------------|-------|------------------|-----------|---------|-------|--------------------------|
| Gupta 2021[99]                | 8     | 200-300          | Krumdieck | Human   | 24    | Other                    |
| Duran-Guëll 2021[100]         | 5     | 200-300          | Vibratome | Mouse   | Other | Toxicity                 |
| Bartucci 2021[101]            | 5     | 200-300<br>> 300 | Krumdieck | Mouse   | 72    | Inflammation<br>Fibrosis |
| Aluru 2021[102]               | Other | ns               | ns        | Fish    | 48    | Metabolization           |
| Aranguren-Abadia<br>2020[103] | 8     | 200-300          | Vibratome | Fish    | 48    | Characterization         |
| Estrada-Ortiz 2019[104]       | 5     | 200-300          | Krumdieck | Rat     | 24    | Cancer                   |
| Guzman-Delgado<br>2019[105]   | 5     | 200-300          | Krumdieck | Hamster | 24    | Other                    |
| Tian 2020[106]                | 5     | 200-300          | Vibratome | Rat     | 24    | Cancer                   |
| Zarybnicky 2020[107]          | 8     | < 200            | Krumdieck | Human   | 24    | Optimization             |
| <hr/>                         |       |                  |           |         |       |                          |
| Total                         | 107   |                  |           |         |       |                          |

ns = not specified

1. van Midwoud, P.M., et al., *Hydrogel embedding of precision-cut liver slices in a microfluidic device improves drug metabolic activity*. Biotechnol Bioeng, 2011. **108**(6): p. 1404-12.
2. Lemaire, B., et al., *Precision-Cut Liver Slices of Salmo salar as a tool to investigate the oxidative impact of CYP1A-mediated PCB 126 and 3-methylcholanthrene metabolism*. Toxicol In Vitro, 2011. **25**(1): p. 335-42.
3. Khan, A.A., et al., *The role of lithocholic acid in the regulation of bile acid detoxication, synthesis, and transport proteins in rat and human intestine and liver slices*. Toxicol In Vitro, 2011. **25**(1): p. 80-90.
4. Kasper, H.U., et al., *Cryopreservation of precision cut tissue slices (PCTS): investigation of morphology and reactivity*. Exp Toxicol Pathol, 2011. **63**(6): p. 575-80.
5. Elferink, M.G., et al., *Gene expression analysis of precision-cut human liver slices indicates stable expression of ADME-Tox related genes*. Toxicol Appl Pharmacol, 2011. **253**(1): p. 57-69.

6. Burkhardt, B., et al., *Oxidative metabolism of the mycotoxins alternariol and alternariol-9-methyl ether in precision-cut rat liver slices in vitro*. Mol Nutr Food Res, 2011. **55**(7): p. 1079-86.
7. Bie, J., et al., *Macrophage-specific transgenic expression of cholesteryl ester hydrolase attenuates hepatic lipid accumulation and also improves glucose tolerance in ob/ob mice*. Am J Physiol Endocrinol Metab, 2012. **302**(10): p. E1283-91.
8. Thomes, P.G., et al., *Proteasome activity and autophagosome content in liver are reciprocally regulated by ethanol treatment*. Biochem Biophys Res Commun, 2012. **417**(1): p. 262-7.
9. Rijk, J.C., et al., *Bovine liver slices: A multifunctional in vitro model to study the prohormone dehydroepiandrosterone (DHEA)*. Toxicol In Vitro, 2012. **26**(6): p. 1014-21.
10. Lemaire, B., et al., *Precision-cut liver slices to investigate responsiveness of deep-sea fish to contaminants at high pressure*. Environ Sci Technol, 2012. **46**(18): p. 10310-6.
11. Guo, Y., et al., *Protective effect of sodium ferulate on acetaldehyde-treated precision-cut rat liver slices*. J Med Food, 2012. **15**(6): p. 557-62.
12. Guan, N., et al., *Effects of cryoprotectant addition and washout methods on the viability of precision-cut liver slices*. Cryobiology, 2012. **65**(3): p. 179-87.
13. Dragoni, S., et al., *Gold nanoparticles uptake and cytotoxicity assessed on rat liver precision-cut slices*. Toxicol Sci, 2012. **128**(1): p. 186-97.
14. Wang, K., et al., *Hepatic apoptosis can modulate liver fibrosis through TIMP1 pathway*. Apoptosis, 2013. **18**(5): p. 566-77.
15. Szalowska, E., et al., *Treatment of mouse liver slices with cholestatic hepatotoxicants results in down-regulation of Fxr and its target genes*. BMC Med Genomics, 2013. **6**: p. 39.
16. Szalowska, E., et al., *Effect of oxygen concentration and selected protocol factors on viability and gene expression of mouse liver slices*. Toxicol In Vitro, 2013. **27**(5): p. 1513-24.
17. Morán-Salvador, E., et al., *Cell-specific PPAR $\gamma$  deficiency establishes anti-inflammatory and anti-fibrogenic properties for this nuclear receptor in non-parenchymal liver cells*. J Hepatol, 2013. **59**(5): p. 1045-53.
18. Morales-Ibanez, O., et al., *Human and experimental evidence supporting a role for osteopontin in alcoholic hepatitis*. Hepatology, 2013. **58**(5): p. 1742-56.
19. Karim, S., et al., *An in vitro model of human acute ethanol exposure that incorporates CXCR3- and CXCR4-dependent recruitment of immune cells*. Toxicol Sci, 2013. **132**(1): p. 131-41.
20. Hadi, M., et al., *Human precision-cut liver slices as an ex vivo model to study idiosyncratic drug-induced liver injury*. Chem Res Toxicol, 2013. **26**(5): p. 710-20.
21. Hadi, M., et al., *AMAP, the alleged non-toxic isomer of acetaminophen, is toxic in rat and human liver*. Arch Toxicol, 2013. **87**(1): p. 155-65.
22. Guan, N., et al., *Analysis of gene expression changes to elucidate the mechanism of chilling injury in precision-cut liver slices*. Toxicol In Vitro, 2013. **27**(2): p. 890-9.



23. Duryee, M.J., et al., *Precision-cut liver slices from diet-induced obese rats exposed to ethanol are susceptible to oxidative stress and increased fatty acid synthesis*. Am J Physiol Gastrointest Liver Physiol, 2014. **306**(3): p. G208-17.
24. Westra, I.M., et al., *The effect of antifibrotic drugs in rat precision-cut fibrotic liver slices*. PLoS One, 2014. **9**(4): p. e95462.
25. Westra, I.M., et al., *Precision-cut liver slices as a model for the early onset of liver fibrosis to test antifibrotic drugs*. Toxicol Appl Pharmacol, 2014. **274**(2): p. 328-38.
26. van Swelm, R.P., et al., *Proteomic profiling in incubation medium of mouse, rat and human precision-cut liver slices for biomarker detection regarding acute drug-induced liver injury*. J Appl Toxicol, 2014. **34**(9): p. 993-1001.
27. Szalowska, E., et al., *Model steatogenic compounds (amiodarone, valproic acid, and tetracycline) alter lipid metabolism by different mechanisms in mouse liver slices*. PLoS One, 2014. **9**(1): p. e86795.
28. Szalowska, E., et al., *Transcriptomic signatures of peroxisome proliferator-activated receptor  $\alpha$  (PPAR $\alpha$ ) in different mouse liver models identify novel aspects of its biology*. BMC Genomics, 2014. **15**(1): p. 1106.
29. Rius, B., et al., *Resolvin D1 primes the resolution process initiated by calorie restriction in obesity-induced steatohepatitis*. Faseb j, 2014. **28**(2): p. 836-48.
30. Kwon, H.J., et al., *Aldehyde dehydrogenase 2 deficiency ameliorates alcoholic fatty liver but worsens liver inflammation and fibrosis in mice*. Hepatology, 2014. **60**(1): p. 146-57.
31. Koch, A., et al., *Murine precision-cut liver slices (PCLS): a new tool for studying tumor microenvironments and cell signaling ex vivo*. Cell Commun Signal, 2014. **12**: p. 73.
32. Jetten, M.J., et al., *Interindividual variation in response to xenobiotic exposure established in precision-cut human liver slices*. Toxicology, 2014. **323**: p. 61-9.
33. Fredriksson, L., et al., *Drug-induced endoplasmic reticulum and oxidative stress responses independently sensitize toward TNF $\alpha$ -mediated hepatotoxicity*. Toxicol Sci, 2014. **140**(1): p. 144-59.
34. Eide, M., et al., *Precision-cut liver slices of Atlantic cod (Gadus morhua): an in vitro system for studying the effects of environmental contaminants*. Aquat Toxicol, 2014. **153**: p. 110-5.
35. Vatakuti, S., et al., *Acute toxicity of CCl<sub>4</sub> but not of paracetamol induces a transcriptomic signature of fibrosis in precision-cut liver slices*. Toxicol In Vitro, 2015. **29**(5): p. 1012-20.
36. Starokozhko, V., et al., *Viability, function and morphological integrity of precision-cut liver slices during prolonged incubation: Effects of culture medium*. Toxicol In Vitro, 2015. **30**(1 Pt B): p. 288-99.
37. Sadasivan, S.K., et al., *Developing an in vitro screening assay platform for evaluation of antifibrotic drugs using precision-cut liver slices*. Fibrogenesis Tissue Repair, 2015. **8**(1): p. 1.
38. Page, A., et al., *Alcohol directly stimulates epigenetic modifications in hepatic stellate cells*. J Hepatol, 2015. **62**(2): p. 388-97.

39. Okun, J.G., et al., *Molecular regulation of urea cycle function by the liver glucocorticoid receptor*. Mol Metab, 2015. **4**(10): p. 732-40.
40. Mattei, G., et al., *Profile analysis of hepatic porcine and murine brain tissue slices obtained with a vibratome*. PeerJ, 2015. **3**: p. e932.
41. Maté, M.L., et al., *Gene expression and enzyme function of two cytochrome P450 3A isoenzymes in rat and cattle precision cut liver slices*. Xenobiotica, 2015. **45**(7): p. 563-70.
42. Liu, Y., et al., *Protective effects of Lycium barbarum polysaccharides against carbon tetrachloride-induced hepatotoxicity in precision-cut liver slices in vitro and in vivo in common carp (Cyprinus carpio L.)*. Comp Biochem Physiol C Toxicol Pharmacol, 2015. **169**: p. 65-72.
43. Janssen, A.W., et al., *The impact of PPAR $\alpha$  activation on whole genome gene expression in human precision cut liver slices*. BMC Genomics, 2015. **16**: p. 760.
44. Du, J.L., et al., *A Study of 2,3,7,8-Tetrachlorodibenzo-p-dioxin Induced Liver Injury in Jian Carp (Cyprinus carpio var. Jian) Using Precision-Cut Liver Slices*. Bull Environ Contam Toxicol, 2016. **96**(1): p. 55-61.
45. Daum, S., et al., *Improved synthesis of N-benzylaminoferrocene-based prodrugs and evaluation of their toxicity and antileukemic activity*. J Med Chem, 2015. **58**(4): p. 2015-24.
46. Westra, I.M., et al., *Human precision-cut liver slices as a model to test antifibrotic drugs in the early onset of liver fibrosis*. Toxicol In Vitro, 2016. **35**: p. 77-85.
47. Viviani, P., et al., *Assessment of liver slices for research on metabolic drug-drug interactions in cattle*. Xenobiotica, 2017. **47**(11): p. 933-942.
48. Vatakuti, S., et al., *Validation of precision-cut liver slices to study drug-induced cholestasis: a transcriptomics approach*. Arch Toxicol, 2017. **91**(3): p. 1401-1412.
49. Vatakuti, S., et al., *Classification of Cholestatic and Necrotic Hepatotoxicants Using Transcriptomics on Human Precision-Cut Liver Slices*. Chem Res Toxicol, 2016. **29**(3): p. 342-51.
50. Starokozhko, V., et al., *Maintenance of drug metabolism and transport functions in human precision-cut liver slices during prolonged incubation for 5 days*. Arch Toxicol, 2017. **91**(5): p. 2079-2092.
51. Iswandana, R., et al., *Organ- and species-specific biological activity of rosmarinic acid*. Toxicol In Vitro, 2016. **32**: p. 261-8.
52. Ijssennagger, N., et al., *Gene expression profiling in human precision cut liver slices in response to the FXR agonist obeticholic acid*. J Hepatol, 2016. **64**(5): p. 1158-1166.
53. Coombes, J.D., et al., *Osteopontin is a proximal effector of leptin-mediated non-alcoholic steatohepatitis (NASH) fibrosis*. Biochim Biophys Acta, 2016. **1862**(1): p. 135-44.
54. Bizarro, C., et al., *Single and mixture effects of aquatic micropollutants studied in precision-cut liver slices of Atlantic cod (Gadus morhua)*. Aquat Toxicol, 2016. **177**: p. 395-404.
55. Vilaseca, M., et al., *Mitochondria-targeted antioxidant mitoquinone deactivates human and rat hepatic stellate cells and reduces portal hypertension in cirrhotic rats*. Liver Int, 2017. **37**(7): p. 1002-1012.

56. Pushparajah, D., D. Lewis, and C. Ioannides, *Up-regulation of CYP1A1 and phase II enzymes by 5-ring isomeric polycyclic aromatic hydrocarbons in precision-cut rat hepatic slices: Importance of molecular shape*. *Toxicol In Vitro*, 2017. **40**: p. 203-213.
57. Villalobos-García, D. and R. Hernández-Muñoz, *Catalase increases ethanol oxidation through the purine catabolism in rat liver*. *Biochem Pharmacol*, 2017. **137**: p. 107-112.
58. Starokozhko, V., et al., *Rat precision-cut liver slices predict drug-induced cholestatic injury*. *Arch Toxicol*, 2017. **91**(10): p. 3403-3413.
59. de Mesquita, F.C., et al., *Liraglutide improves liver microvascular dysfunction in cirrhosis: Evidence from translational studies*. *Sci Rep*, 2017. **7**(1): p. 3255.
60. Fortin, É., et al., *Linoleic acid,  $\alpha$ -linolenic acid and enterolactone affect lipid oxidation and expression of lipid metabolism and antioxidant-related genes in hepatic tissue of dairy cows*. *Br J Nutr*, 2017. **117**(9): p. 1199-1211.
61. Luangmonkong, T., et al., *Evaluating the antifibrotic potency of galunisertib in a human ex vivo model of liver fibrosis*. *Br J Pharmacol*, 2017. **174**(18): p. 3107-3117.
62. Granitzny, A., et al., *Maintenance of high quality rat precision cut liver slices during culture to study hepatotoxic responses: Acetaminophen as a model compound*. *Toxicol In Vitro*, 2017. **42**: p. 200-213.
63. Cao, L., et al., *Anti-inflammatory and hepatoprotective effects of glycyrrhetinic acid on CCl<sub>4</sub>-induced damage in precision-cut liver slices from Jian carp (*Cyprinus carpio* var. *jian*) through inhibition of the nf- $\kappa$ B pathway*. *Fish Shellfish Immunol*, 2017. **64**: p. 234-242.
64. Viviani, P., et al., *Assessment of the pharmacological interactions between the nematocidal fenbendazole and the flukicidal triclabendazole: In vitro studies with bovine liver microsomes and slices*. *J Vet Pharmacol Ther*, 2018. **41**(3): p. 476-484.
65. Yadetie, F., et al., *RNA-Seq analysis of transcriptome responses in Atlantic cod (*Gadus morhua*) precision-cut liver slices exposed to benzo[a]pyrene and 17 $\alpha$ -ethynylestradiol*. *Aquat Toxicol*, 2018. **201**: p. 174-186.
66. Raisová Stuchlíková, L., et al., *The metabolism of flubendazole in human liver and cancer cell lines*. *Drug Test Anal*, 2018.
67. de la Rosa Rodriguez, M.A., et al., *The whole transcriptome effects of the PPAR $\alpha$  agonist fenofibrate on livers of hepatocyte humanized mice*. *BMC Genomics*, 2018. **19**(1): p. 443.
68. Starokozhko, V., et al., *Differentiation of human-induced pluripotent stem cell under flow conditions to mature hepatocytes for liver tissue engineering*. *J Tissue Eng Regen Med*, 2018. **12**(5): p. 1273-1284.
69. Quesnot, N., et al., *Production of chlorzoxazone glucuronides via cytochrome P4502E1 dependent and independent pathways in human hepatocytes*. *Arch Toxicol*, 2018. **92**(10): p. 3077-3091.
70. Wu, X., et al., *Precision-cut human liver slice cultures as an immunological platform*. *J Immunol Methods*, 2018. **455**: p. 71-79.
71. Rius, B., et al., *The specialized proresolving lipid mediator maresin 1 protects hepatocytes from lipotoxic and hypoxia-induced endoplasmic reticulum stress*. *Faseb j*, 2017. **31**(12): p. 5384-5398.
72. Prins, G.H., et al., *A Pathophysiological Model of Non-Alcoholic Fatty Liver Disease Using Precision-Cut Liver Slices*. *Nutrients*, 2019. **11**(3).

73. Lev-Cohain, N., et al., *Real-time ALT and LDH activities determined in viable precision-cut mouse liver slices using hyperpolarized [1-(13) C]pyruvate-Implications for studies on biopsied liver tissues*. NMR Biomed, 2019. **32**(2): p. e4043.
74. Luangmonkong, T., et al., *In vitro and ex vivo anti-fibrotic effects of LY2109761, a small molecule inhibitor against TGF- $\beta$* . Toxicol Appl Pharmacol, 2018. **355**: p. 127-137.
75. Duryee, M.J., et al., *Liver tissue metabolically transformed by alcohol induces immune recognition of liver self-proteins but not in vivo inflammation*. Am J Physiol Gastrointest Liver Physiol, 2018. **314**(3): p. G418-g430.
76. Beaumont, M., et al., *The gut microbiota metabolite indole alleviates liver inflammation in mice*. Faseb j, 2018. **32**(12): p. fj201800544.
77. Maté, L., et al., *Effects of fenbendazole and triclabendazole on the expression of cytochrome P450 1A and flavin-monooxygenase isozymes in bovine precision-cut liver slices*. Vet J, 2019. **245**: p. 61-69.
78. Paish, H.L., et al., *A Bioreactor Technology for Modeling Fibrosis in Human and Rodent Precision-Cut Liver Slices*. Hepatology, 2019. **70**(4): p. 1377-1391.
79. Stärkel, P., et al., *Deficient IL-6/Stat3 Signaling, High TLR7, and Type I Interferons in Early Human Alcoholic Liver Disease: A Triad for Liver Damage and Fibrosis*. Hepatol Commun, 2019. **3**(7): p. 867-882.
80. Stefanovic, B., et al., *Discovery and evaluation of inhibitor of LARP6 as specific antifibrotic compound*. Sci Rep, 2019. **9**(1): p. 326.
81. Harvey, T.N., et al., *Liver slice culture as a model for lipid metabolism in fish*. PeerJ, 2019. **7**: p. e7732.
82. De Chiara, F., et al., *Ammonia Scavenging Prevents Progression of Fibrosis in Experimental Nonalcoholic Fatty Liver Disease*. Hepatology, 2020. **71**(3): p. 874-892.
83. Bigaeva, E., et al., *Transcriptomic characterization of culture-associated changes in murine and human precision-cut tissue slices*. Arch Toxicol, 2019. **93**(12): p. 3549-3583.
84. Gore, E., et al., *PI3K inhibition reduces murine and human liver fibrogenesis in precision-cut liver slices*. Biochem Pharmacol, 2019. **169**: p. 113633.
85. Gore, E., et al., *Investigating fibrosis and inflammation in an ex vivo NASH murine model*. Am J Physiol Gastrointest Liver Physiol, 2020. **318**(2): p. G336-g351.
86. Bigaeva, E., et al., *Exploring organ-specific features of fibrogenesis using murine precision-cut tissue slices*. Biochim Biophys Acta Mol Basis Dis, 2020. **1866**(1): p. 165582.
87. Bartucci, R., et al., *Time-Resolved Quantification of Nanoparticle Uptake, Distribution, and Impact in Precision-Cut Liver Slices*. Small, 2020. **16**(21): p. e1906523.
88. Daga, M., et al., *Glutathione-responsive cyclodextrin-nanosponges as drug delivery systems for doxorubicin: Evaluation of toxicity and transport mechanisms in the liver*. Toxicol In Vitro, 2020. **65**: p. 104800.

89. Palma, E., et al., *Perturbations in Mitochondrial Dynamics Are Closely Involved in the Progression of Alcoholic Liver Disease*. Alcohol Clin Exp Res, 2020. **44**(4): p. 856-865.
90. Zhang, Y., et al., *Cryopreserved biopsy tissues of rectal cancer liver metastasis for assessment of anticancer drug response in vitro and in vivo*. Oncol Rep, 2020. **43**(2): p. 405-414.
91. Aoudjehane, L., et al., *Novel defatting strategies reduce lipid accumulation in primary human culture models of liver steatosis*. Dis Model Mech, 2020. **13**(4).
92. Kenerson, H.L., et al., *Tumor slice culture as a biologic surrogate of human cancer*. Ann Transl Med, 2020. **8**(4): p. 114.
93. van Dijk, F., et al., *Design of a Gene Panel to Expose the Versatile Role of Hepatic Stellate Cells in Human Liver Fibrosis*. Pharmaceutics, 2020. **12**(3).
94. Adhyatmika, A., et al., *Osteoprotegerin is More than a Possible Serum Marker in Liver Fibrosis: A Study into its Function in Human and Murine Liver*. Pharmaceutics, 2020. **12**(5).
95. Suriguga, S., et al., *Host microbiota dictates the proinflammatory impact of LPS in the murine liver*. Toxicol In Vitro, 2020. **67**: p. 104920.
96. Serrano, J., et al., *In vitro metabolism assessment of thiacloprid in rainbow trout and rat by LC-UV and high resolution-mass spectrometry*. Xenobiotica, 2021: p. 1-13.
97. Shepherd, E.L., et al., *Inhibition of vascular adhesion protein-1 modifies hepatic steatosis in vitro and in vivo*. World J Hepatol, 2020. **12**(11): p. 931-948.
98. Barcena-Varela, M., et al., *Epigenetic mechanisms and metabolic reprogramming in fibrogenesis: dual targeting of G9a and DNMT1 for the inhibition of liver fibrosis*. Gut, 2021. **70**(2): p. 388-400.
99. Gupta, R., et al., *Comparing in vitro human liver models to in vivo human liver using RNA-Seq*. Arch Toxicol, 2021. **95**(2): p. 573-589.
100. Duran-Güell, M., et al., *Albumin protects the liver from tumor necrosis factor  $\alpha$ -induced immunopathology*. Faseb j, 2021. **35**(2): p. e21365.
101. Bartucci, R., et al., *Nanoparticle-induced inflammation and fibrosis in ex vivo murine precision-cut liver slices and effects of nanoparticle exposure conditions*. Arch Toxicol, 2021.
102. Aluru, N., et al., *Hepatic gene expression profiling of OPFR exposed Atlantic cod (*Gadus morhua*) liver revealed altered cholesterol biosynthesis and lipid metabolism*. Environ Toxicol Chem, 2021.
103. Aranguren-Abadía, L., et al., *Molecular and Functional Properties of the Atlantic Cod (*Gadus morhua*) Aryl Hydrocarbon Receptors Ahr1a and Ahr2a*. Environ Sci Technol, 2020. **54**(2): p. 1033-1044.
104. Estrada-Ortiz, N., et al., *Ex vivo toxicological evaluation of experimental anticancer gold(i) complexes with lansoprazole-type ligands*. Toxicol Res (Camb), 2019. **8**(6): p. 885-895.
105. Guzmán-Delgado, N.E., et al., *Development of a Novel Ex-vivo 3D Model to Screen Amoebicidal Activity on Infected Tissue*. Sci Rep, 2019. **9**(1): p. 8396.

106. Tian, H., et al., *A Novel Tissue-Based Liver-Kidney-on-a-Chip Can Mimic Liver Tropism of Extracellular Vesicles Derived from Breast Cancer Cells*. Biotechnol J, 2020. **15**(2): p. e1900107.
107. Zárýbnický, T., et al., *The Selection and Validation of Reference Genes for mRNA and microRNA Expression Studies in Human Liver Slices Using RT-qPCR*. Genes (Basel), 2019. **10**(10).
